# Supplementary material
Source: PubMed Central journal article supplement (PMC3347313)
Supplement: supp_86.10.5674_FigS1.pdf [file supp_86.10.5674_FigS1.pdf]

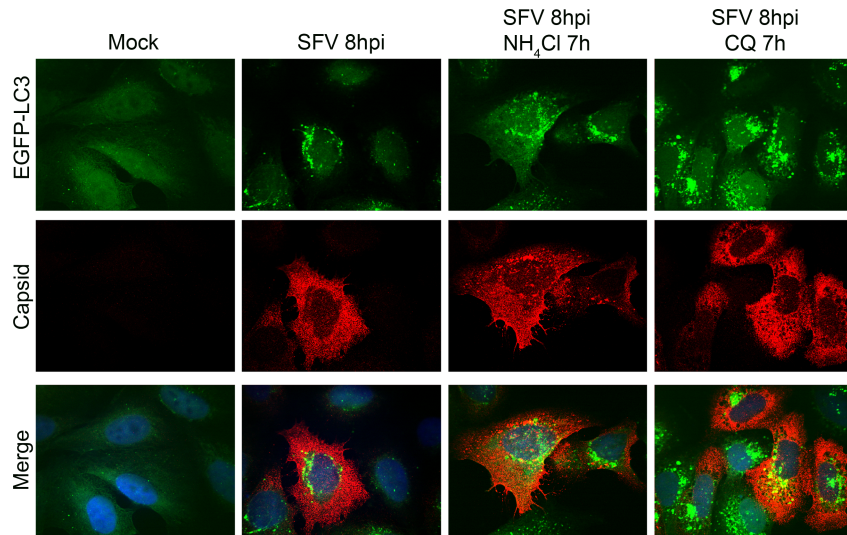

**Figure S1**  
**Eng et al 2012**

**Figure S1. SFV capsid protein does not accumulate in autophagosomes after inhibition of lysosomal degradation.** HOS-EGFP-LC3 cells were mock infected or infected with SFV at MOI 1. At 1 hpi, virus solution was removed and cells were washed with PBS and placed in complete medium, complete medium containing 15 mM NH<sub>4</sub>Cl or complete medium containing 50 μM CQ. At 8 hpi, cells were fixed and stained for SFV capsid (red) and analysed by confocal microscopy. Hoechst was used to identify cell nuclei (blue). Representative images are shown.
