# Supplementary material
Source: PubMed Central journal article supplement (PMC3347313)
Supplement: supp_86.10.5674_FigS2.pdf [file supp_86.10.5674_FigS2.pdf]

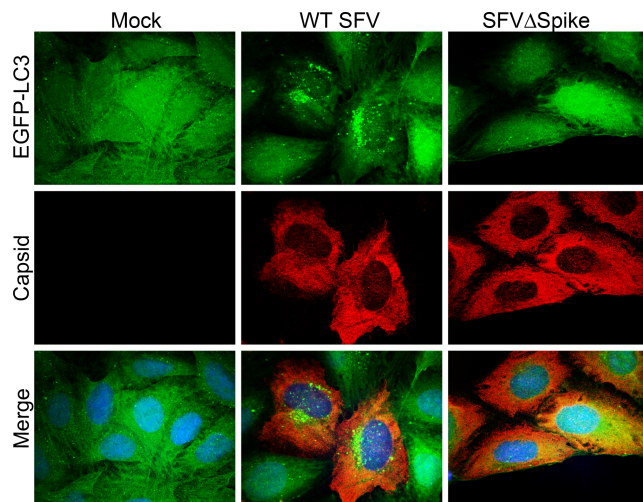

**Figure S2**  
**Eng et al 2012**

**Figure S2. Cells infected with SFV- $\Delta$ Spike show normal capsid expression and reduced autophagosome accumulation relative to those infected with wt SFV.**

HOS-EGFP-LC3 cells were mock infected or infected with wt SFV or SFV- $\Delta$ Spike at MOI 2. At 8 hpi, cells were fixed and stained for SFV capsid (red) and analysed for EGFP-LC3 positive puncta by confocal microscopy. Hoechst was used to identify cell nuclei (blue). Representative images are shown.
